# Supplementary material
Source: Springer Nature journal article supplement (https://www.springermedizin.de/resource/supplementary/12889_2008_1258_MOESM3_ESM.pdf/9502800)

**TOTAL POPULATION**

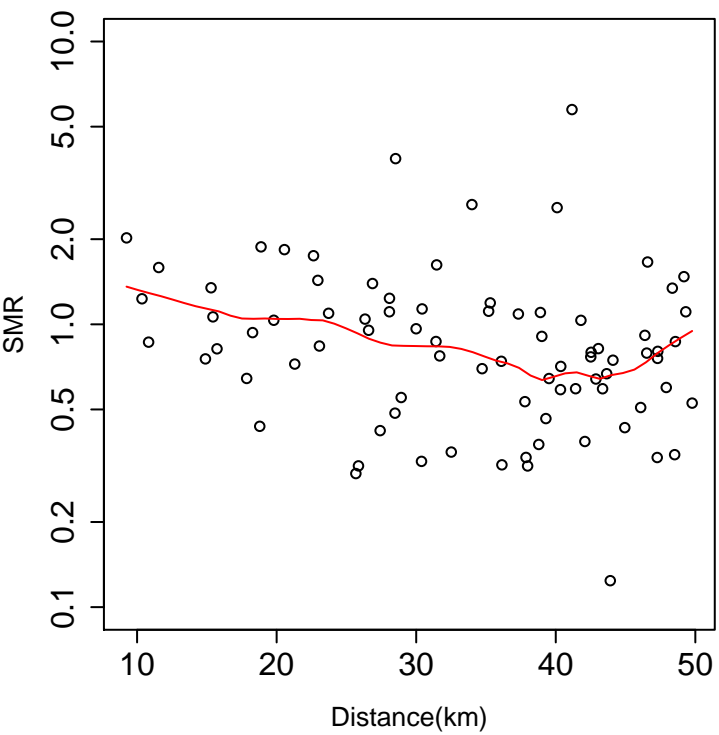

**MEN**

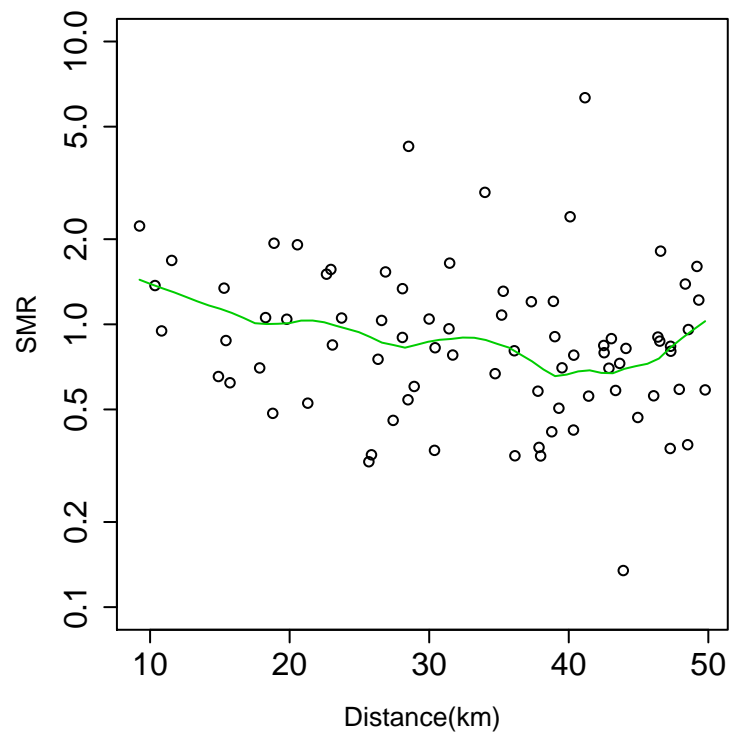

**WOMEN**

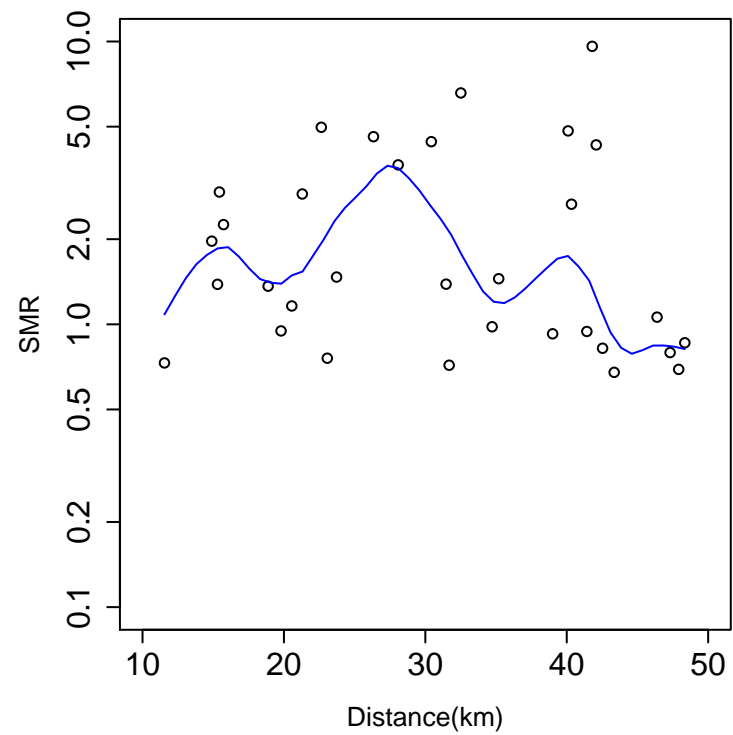

Supplement: MOESM3 [file 9502800]
